# Supplementary material for: Methodological concerns with laser speckle contrast imaging in clinical evaluation of microcirculation
Source: PLoS One. 2017 Mar 30;12(3):e0174703. doi: 10.1371/journal.pone.0174703 (PMC5373607; doi:10.1371/journal.pone.0174703)
Supplement: S1 Supplemental Material — (XLSX) [file pone.0174703.s001.xlsx]

## Sheet: Distance
	15	20	25	30	35	40
P01	201.93	210.38	205.75	204.23	206.16	205.93
P02	100.19	97.41	90.55	97.55	90.13	98.47
P03	191.01	176.49	192.54	180.36	188.36	182.73
P04	142.35	142.65	142.58	146.67	140.63	141.87
P05	122.72	119.73	126.88	129.93	137.2	118.49

## Sheet: Angle
	0	15	30	45	60
P01	132.29	135.21	132.26	118.14	94.9
P02	192.54	187.36	183.72	182.7	166.24
P03	90.5	92.42	85.41	80.9	72.69
P04	205.75	226.22	220.28	184.55	189.06
P05	135.92	142.55	138.28	130.16	115.58

## Sheet: Calibration Standard
	21_42	10_21	5_10	21_5	21_10	21_21
0	70.616	65.258	64.192	64.536	64.594	63.942
45	156.606	150.726	157.302	149.222	148.622	151.134
62	196.46	198.57	196.918	197.556	191.106	193.086
93	247.778	242.006	241.344	236.062	248.802	235.918
125	294.47	291.53	295.99	290.766	300.594	299.002
172	375.742	375.658	374.41	371.49	379.814	374.066
205	423.91	426.982	431.138	429.978	435.188	433.626

## Sheet: Forearm Methyl Nicotinate
2.5 mM	21 fps, averaging 42								10 fps, averaging 21								5 fps, averaging 10								21 fps, averaging 5								21 fps, averaging 10								21 fps, averaging 21
	P06	P07	P08	P09	P10	P11	P12	P13	P06	P07	P08	P09	P10	P11	P12	P13	P06	P07	P08	P09	P10	P11	P12	P13	P06	P07	P08	P09	P10	P11	P12	P13	P06	P07	P08	P09	P10	P11	P12	P13	P06	P07	P08	P09	P10	P11	P12	P13
0	168.41	141.85	106.85	151.77	153.92	33.2	144.538	128.968	168.41	141.85	106.85	151.77	153.92	33.2	144.538	128.968	168.41	141.85	106.85	151.77	153.92	33.2	144.538	128.968	168.41	141.85	106.85	151.77	153.92	33.2	144.538	128.968	168.41	141.85	106.85	151.77	153.92	33.2	144.538	128.968	168.41	141.85	106.85	151.77	153.92	33.2	144.538	128.968
25	207.434	191.026	182.878	213.314	237.924	128.99	228.634	199.496	218.026	206.954	192.298	202.83	236.212	125.384	236.2	210.738	212.252	193.042	181.42	206.976	225.67	131.018	236.924	206.876	231.934	215.64	188.548	227.356	220.666	127.34	220.498	216.344	213.49	211.978	186.492	249.256	226.94	142.254	237.548	205.374	227.106	226.822	189.646	265.834	230.514	135.142	245.198	206.436
32	236.41	207.768	182.096	209.198	250.08	120.942	232.158	211.52	235.336	216.632	183.028	219.538	253.118	133.82	240.064	211.306	236.284	207.182	183.032	215.306	252.562	135.03	244.234	206.178	234.946	213.786	186.18	257.726	261.654	138.454	240.164	197.478	217.676	213.656	195.188	237.634	242.762	136.628	237.702	209.134	218.996	207.878	188.64	235.034	252.892	142.064	238.556	212.896
41	260.204	234.526	218.746	221.83	269.176	143.542	236.78	217.132	257.016	231.814	217.716	223.186	273.838	135.996	235.682	221.564	261.304	234.314	210.73	213.84	275.004	142.224	238.434	212.016	250.008	231.134	213.726	267.126	278	122.774	239.542	219.782	249.41	226.654	216.206	261.132	266.76	133.262	229.646	213.192	266.454	237.58	210.388	259.586	261.314	136.248	242.064	219.948
61	278.776	249.028	251.498	233.684	298.42	176.596	272.632	263.114	282.746	249.936	251.182	234.756	299.812	171.36	280.91	254.07	275.612	247.028	254.076	246.5	298.216	176.264	276.13	255.592	290.546	245.172	260.02	273.594	299.106	177.158	258.162	252.666	270.926	258.176	248.814	251.438	294.856	172.38	274.086	251.496	280.382	264.082	250.528	246.104	295.74	166.394	280.21	253.646
90	303.376	257.264	288.364	255.372	306.4	173.772	287.034	277.09	301.87	251.732	296.866	262.54	309.426	182.076	294.524	276.554	305.01	261.862	304.716	246.498	316.072	185.57	297.878	273.862	306.094	268.89	303.726	282.346	312.12	178.944	288.308	278.386	288.678	268.386	278.53	281.442	319.552	198.422	287.226	277.88	307.03	268.04	279.998	253.984	316.038	192.338	296.474	281.852
10 mM
0	180.79	136.44	115.78	176.09	172.42	32.3	122.4	118.336	180.79	136.44	115.78	176.09	172.42	32.3	122.4	118.336	180.79	136.44	115.78	176.09	172.42	32.3	122.4	118.336	180.79	136.44	115.78	176.09	172.42	32.3	122.4	118.336	180.79	136.44	115.78	176.09	172.42	32.3	122.4	118.336	180.79	136.44	115.78	176.09	172.42	32.3	122.4	118.336
25	251.384	203.322	207.986	247.934	283.07	138.51	198.444	203.386	259.52	220.572	214.888	244.534	281.002	135.492	207.85	210.36	260.388	208.216	201.942	241.372	276.928	141.848	207.832	209.926	272.95	220.306	209.716	273.316	277.942	139.556	184.104	229.136	259.39	234.672	210.59	270.554	272.068	155.342	208.352	209.748	267.396	236.198	210.234	291.526	273.618	137.458	215.864	209.582
32	275.398	224.144	208.784	246.82	293.792	128.674	204.202	214.776	272.534	234.902	211.492	255.848	288.138	147.796	210.2	213.364	270.134	228.184	209.796	261.986	294.204	139.944	216.04	207.294	270.162	231.238	222.146	255.898	294.848	153.362	218.604	198.274	261.714	224.946	221.054	263.036	288.442	142.794	215.042	221.75	263.236	235.328	214.098	272.288	298.178	150.418	215.38	217.868
41	297.77	253.67	248.694	248.264	313.714	149.654	212.528	227.586	299.034	246.202	246.878	259.812	314.292	142.19	214.4	230.712	298.278	254.478	247.56	247.268	321.006	145.196	213.906	219.72	287.394	240.78	239.78	275.588	314.008	138.734	215.112	221.828	297.878	256.39	243.936	291.554	311.61	145.726	213.484	225.632	304.298	259.696	241.482	304.486	304.662	149.776	219.422	234.006
61	313.15	258.54	283.148	272.488	340.644	181.488	251.058	272.798	315.97	277.298	283.226	274.326	346.414	179.062	259.928	267.832	305.362		298.76	278.598	335.226	184.888	256.664	270.136	336.882	274.164	294.93	296.552	339	187.534	247.138	262.524	313.332	279.922	288.308	278.104	330.484	189.33	254.746	263.424	311.5	277.094	289.282	292.33	341.952	181.016	261.22	264.84
90	333.028	271.758	320.97	304.794	348.812	178.576	268.708	290.568	333.5	273.566	331.93	306.466	357.088	185.882	286.2	298.06	335.694	281.798	335.164	300.774	361.8	195.77	280.29	293.54	341.83	284.266	336.342	307.446	362.334	184.338	268.76	288.522	329.514	278.652	308.124	325.05	364.12	199.198	268.38	291.956	335.244	279.592	318.616	300.64	370.88	196.634	280.144	299.196
40 mM
0	177.1	125.18	102.11	146.1	168.92	31.38	120.328	110.614	177.1	125.18	102.11	146.1	168.92	31.38	120.328	110.614	177.1	125.18	102.11	146.1	168.92	31.38	120.328	110.614	177.1	125.18	102.11	146.1	168.92	31.38	120.328	110.614	177.1	125.18	102.11	146.1	168.92	31.38	120.328	110.614	177.1	125.18	102.11	146.1	168.92	31.38	120.328	110.614
25	255.182	190.642	179.402	213.314	247.78	140.396	206.394	187.018	258.38	208.226	183.11	202.83	243.376	139.334	217.264	195.626	263.74	196.982	176.592	206.976	240.324	151.1	215.498	193.332	279.772	202.434	178.396	227.356	261.364	139.904	194.104	221.206	258.124	207.698	181.63	249.256	240.416	159.232	219.822	185.286	266.56	223.32	183.946	265.834	241.078	145.086	225.308	186.856
32	274.064	205.774	173.292	209.198	256.778	133.502	214.722	192.292	268.83	213.318	178.466	219.538	255.686	148.614	217.708	197.152	267.73	218.932	178.996	215.306	267.968	150.12	228.484	188.838	278.462	209.256	182.328	257.726	271.924	152.608	221.944	183.538	254.788	219.822	191.946	237.634	256.846	148.076	221.384	196.442	256.792	196.964	185.754	235.034	257.346	156.704	219.452	196.434
41	291.476	227.728	212.042	221.83	275.898	154.272	222.19	199.444	290.844	228.234	205.532	223.186	276.368	148.838	228.36	203.046	299.962	241.346	211.536	213.84	279.864	145.266	224.556	199.682	291.468	235.382	202.512	267.126	276.878	137.312	218.098	215.378	289.718	233.696	211.264	261.132	271.096	143.57	221.324	201.004	302.15	234.37	202.476	259.586	266.03	156.28	230.626	203.57
61	310.228	249.322	243.084	233.684	295.546	186.548	262.558	246.962	306.128	252.556	239.594	234.756	304.148	186.012	270.664	242.952	290.886		247.954	246.5	289.048	186.936	269.934	238.67	330.406	246.842	255.026	273.594	292.118	195.474	257.95	242.378	309.066	257.328	255.948	251.438	297.434	194.646	260.202	239.864	302.656	258.452	234.098	246.104	308.282	183.312	269.794	239.568
90	325.392	255.522	261.352	255.372	313.72	192.652	271.746	259.128	321.526	255.668	276.46	262.54	315.82	197.702	287.886	263.554	328.43	267.186	272.902	246.498	322.826	206.132	288.024	260.294	327.02	264.9	305.748	282.346	310.618	204.106	288.19	260.604	313.266	262.65	264.074	281.442	318.652	213.722	287.662	262.082	324.668	265.866	264.61	253.984	325.086	209.128	289.344	263.57
